# Supplementary material
Source: MDPI journal article supplement (https://www.mdpi.com/2073-4344/11/7/849)
Supplement: s1 [file s1]

**Table S1.** The main organic compound components of bio-oil (no catalyst)

| Chemical compound                                   | Molecular formula                                             | Area (%)<br>No catalyst |
|-----------------------------------------------------|---------------------------------------------------------------|-------------------------|
| <b>Hydrocarbons</b>                                 |                                                               |                         |
| Decane                                              | C <sub>10</sub> H <sub>22</sub>                               | 1.53                    |
| 1-Nonadecene                                        | C <sub>19</sub> H <sub>38</sub>                               | 1.46                    |
| E,E-1,9,17-Docasatriene                             | C <sub>22</sub> H <sub>40</sub>                               | 1.32                    |
| Cholest-5-ene                                       | C <sub>27</sub> H <sub>46</sub>                               | 1.66                    |
| 3,5-Cyclo-6,8(14),22-ergostatriene                  | C <sub>28</sub> H <sub>42</sub>                               | 0.95                    |
| <b>Nitrogen compounds</b>                           |                                                               |                         |
| <b>Amides</b>                                       |                                                               |                         |
| N,N-Dimethylacetamide                               | C <sub>4</sub> H <sub>9</sub> NO                              | 0.62                    |
| N-(3-Methylbutyl)acetamide                          | C <sub>7</sub> H <sub>15</sub> NO                             | 0.98                    |
| Acetamide, N-(2-phenylethyl)-                       | C <sub>10</sub> H <sub>13</sub> NO                            | 1.56                    |
| Dodecanamide, N-ethyl-                              | C <sub>14</sub> H <sub>29</sub> NO                            | 2.2                     |
| Hexadecanamide                                      | C <sub>16</sub> H <sub>33</sub> NO                            | 1.58                    |
| 9-Octadecenamide, (Z)-                              | C <sub>18</sub> H <sub>35</sub> NO                            | 1.48                    |
| Octadecanamide, N-butyl-                            | C <sub>22</sub> H <sub>45</sub> NO                            | 1.47                    |
| <b>Amines</b>                                       |                                                               |                         |
| Benzenamine, 3-methoxy-                             | C <sub>7</sub> H <sub>9</sub> NO                              | 0.48                    |
| Benzenamine, 3,4-dimethoxy-                         | C <sub>8</sub> H <sub>11</sub> NO <sub>2</sub>                | 0.51                    |
| Undecanoic acid, 11-amino-                          | C <sub>11</sub> H <sub>23</sub> NO <sub>2</sub>               | 0.68                    |
| N-Methyldodecanamide                                | C <sub>13</sub> H <sub>27</sub> NO                            | 1.34                    |
| N-Ethyl-4-methyl-4-decanamine                       | C <sub>13</sub> H <sub>29</sub> N                             | 2.86                    |
| <b>Pyrroles</b>                                     |                                                               |                         |
| 2-Pyrrolidinone                                     | C <sub>4</sub> H <sub>7</sub> NO                              | 1.32                    |
| Pyrrolidine, 1-acetyl-                              | C <sub>6</sub> H <sub>11</sub> NO                             | 2.01                    |
| Pyrrolidine, 1-(1-cyclopenten-1-yl)-                | C <sub>9</sub> H <sub>15</sub> N                              | 3.11                    |
| 3-Isobutylhexahydropyrrolo[1,2-a]pyrazine-1,4-dione | C <sub>11</sub> H <sub>18</sub> N <sub>2</sub> O <sub>2</sub> | 1.44                    |
| Tetradecanoic acid, pyrrolidide                     | C <sub>18</sub> H <sub>35</sub> NO                            | 0.78                    |
| <b>Pyridines</b>                                    |                                                               |                         |
| 3-Pyridinol, 2,6-dimethyl-                          | C <sub>7</sub> H <sub>9</sub> NO                              | 1.36                    |
| 2-Pyridinamine, 3-methyl-                           | C <sub>6</sub> H <sub>8</sub> N <sub>2</sub>                  | 1.59                    |
| 4-Pyridinamine, N,N,2,6-tetramethyl-                | C <sub>9</sub> H <sub>13</sub> N <sub>2</sub>                 | 0.37                    |
| 3-Pyridinol, 2-ethyl-6-methyl-                      | C <sub>8</sub> H <sub>11</sub> NO                             | 1.08                    |
| 9H-Pyrido[3,4-b]indole                              | C <sub>11</sub> H <sub>8</sub> N <sub>2</sub>                 | 1.99                    |
| 9H-Pyrido[3,4-b]indole, 1-methyl-                   | C <sub>12</sub> H <sub>10</sub> N <sub>2</sub>                | 2.3                     |
| 3,5-Diethyl-2-(2-furyl)pyridine                     | C <sub>13</sub> H <sub>15</sub> NO                            | 1.77                    |
| <b>Indoles</b>                                      |                                                               |                         |
| Indole                                              | C <sub>8</sub> H <sub>7</sub> N                               | 3.5                     |
| Indole, 3-methyl-                                   | C <sub>9</sub> H <sub>9</sub> N                               | 2.71                    |
| 1H-Indole, 5,6,7-trimethyl-                         | C <sub>11</sub> H <sub>13</sub> N                             | 0.58                    |
| <b>Pyrazines</b>                                    |                                                               |                         |
| Pyrazine, 2,5-dimethyl-                             | C <sub>6</sub> H <sub>8</sub> N <sub>2</sub>                  | 2.82                    |

|                                          |                                                               |      |
|------------------------------------------|---------------------------------------------------------------|------|
| Pyrazine, 3-ethyl-2,5-dimethyl-          | C <sub>8</sub> H <sub>12</sub> N <sub>2</sub>                 | 2.45 |
| 3,6-Dipropyl-2,5-dimethylpyrazine        | C <sub>12</sub> H <sub>20</sub> N <sub>2</sub>                | 1.59 |
| <b><i>Piperidines</i></b>                |                                                               |      |
| Piperidine, 1-acetyl-                    | C <sub>7</sub> H <sub>13</sub> NO                             | 2.85 |
| 4-Piperidinone, 2,2,6,6-tetramethyl-     | C <sub>9</sub> H <sub>17</sub> NO                             | 1.58 |
| <b><i>Others</i></b>                     |                                                               |      |
| 3-Benzyl-6-isopropyl-2,5-piperazinedione | C <sub>14</sub> H <sub>18</sub> N <sub>2</sub> O <sub>2</sub> | 1.08 |
| 3,6-Diisopropyl-2,5-piperazinedione      | C <sub>10</sub> H <sub>18</sub> N <sub>2</sub> O <sub>2</sub> | 1.16 |
| Benzonitrile, 2,4,6-trimethyl-           | C <sub>10</sub> H <sub>11</sub> N                             | 1.56 |
| <hr/> <b><i>Oxygenated compounds</i></b> |                                                               |      |
| <b><i>Organic acids</i></b>              |                                                               |      |
| n-Hexadecanoic acid                      | C <sub>16</sub> H <sub>32</sub> O <sub>2</sub>                | 3.55 |
| 9,12-Octadecadienoic acid (Z,Z)-         | C <sub>18</sub> H <sub>32</sub> O <sub>2</sub>                | 6.26 |
| <b><i>Alcohols</i></b>                   |                                                               |      |
| Isosorbide                               | C <sub>6</sub> H <sub>10</sub> O <sub>4</sub>                 | 5.16 |
| Sorbitol                                 | C <sub>6</sub> H <sub>14</sub> O <sub>6</sub>                 | 5.67 |
| Neoergosterol                            | C <sub>27</sub> H <sub>40</sub> O                             | 1.09 |
| Ergosterol                               | C <sub>28</sub> H <sub>44</sub> O                             | 1.22 |
| <b><i>Esters</i></b>                     |                                                               |      |
| Acetic acid, octyl ester                 | C <sub>10</sub> H <sub>20</sub> O <sub>2</sub>                | 2.79 |
| Hexadecanoic acid, ethyl ester           | C <sub>18</sub> H <sub>36</sub> O <sub>2</sub>                | 3.87 |
| <b><i>Phenols</i></b>                    |                                                               |      |
| Phenol                                   | C <sub>6</sub> H <sub>6</sub> O                               | 1.05 |
| p-Cresol                                 | C <sub>7</sub> H <sub>8</sub> O                               | 3.96 |
| Phenol, 3,5-bis(1,1-dimethylethyl)-      | C <sub>14</sub> H <sub>22</sub> O                             | 1.59 |

**Table S2.** The main organic compound components of bio-oil (Na<sub>2</sub>CO<sub>3</sub>, NaOH)

| Chemical compound                      | Molecular<br>formula               | Area (%)                                |      |      |      |      |              |      |      |      |      |
|----------------------------------------|------------------------------------|-----------------------------------------|------|------|------|------|--------------|------|------|------|------|
|                                        |                                    | Na <sub>2</sub> CO <sub>3</sub> (wt. %) |      |      |      |      | NaOH (wt. %) |      |      |      |      |
|                                        |                                    | 1                                       | 3    | 5    | 8    | 10   | 1            | 3    | 5    | 8    | 10   |
| <b><i>Hydrocarbons</i></b>             |                                    |                                         |      |      |      |      |              |      |      |      |      |
| Decane                                 | C <sub>10</sub> H <sub>22</sub>    | 1.05                                    | 1.22 | 2.1  | 1.63 | 1.33 | 0.97         | 0.82 | -    | 1.21 | 0.65 |
| 1H-Indene,2,3-dihydro-1,1,4-trimethyl- | C <sub>12</sub> H <sub>16</sub>    | 0.58                                    | -    | -    | 1.05 | 0.96 | -            | 0.71 | 1.11 | 0.65 | -    |
| 1,2,3,4-Tetrahydrochrysene             | C <sub>18</sub> H <sub>16</sub>    | -                                       | 0.78 | 0.42 | -    | -    | 1.78         | -    | 0.86 | -    | 0.78 |
| Heptadecane                            | C <sub>17</sub> H <sub>36</sub>    | -                                       | 1.06 | -    | 0.86 | 1.19 | -            | 0.79 | -    | 0.56 | 1.06 |
| 1-Nonadecene                           | C <sub>19</sub> H <sub>38</sub>    | 1.42                                    | 2.05 | 1.09 | 1.32 | 2.08 | 1.69         | 1.33 | 0.92 | 1.19 | 1.93 |
| Atis-16-ene, 5π8π9π10π12π-             | C <sub>20</sub> H <sub>32</sub>    | -                                       | -    | 0.46 | 0.78 | -    | -            | -    | -    | -    | -    |
| E,E-1,9,17-Docasatriene                | C <sub>22</sub> H <sub>40</sub>    | 0.79                                    | 1.5  | -    | -    | 1.76 | -            | -    | 1.03 | -    | -    |
| Cholest-5-ene                          | C <sub>27</sub> H <sub>46</sub>    | 3.03                                    | 1.79 | 2.03 | 1.83 | 2.11 | 2.14         | 1.56 | 2.44 | 2.07 | 1.29 |
| 3,5-Cyclo-6,8(14),22-ergostatriene     | C <sub>28</sub> H <sub>42</sub>    | 0.54                                    | 1.56 | 2.24 | 1.05 | -    | 1.88         | 1.41 | 0.81 | 1.62 | 2.01 |
| <b><i>Nitrogen compounds</i></b>       |                                    |                                         |      |      |      |      |              |      |      |      |      |
| <b><i>Amides</i></b>                   |                                    |                                         |      |      |      |      |              |      |      |      |      |
| N,N-Dimethylacetamide                  | C <sub>4</sub> H <sub>9</sub> NO   | 1.16                                    | 0.59 | 0.92 | 0.78 | -    | 0            | 1.57 | 1.78 | 0    | 0    |
| Caprolactam                            | C <sub>6</sub> H <sub>11</sub> NO  | 0.59                                    | 0.54 | -    | -    | 0.96 | -            | -    | -    | -    | -    |
| N-(3-Methylbutyl)acetamide             | C <sub>7</sub> H <sub>15</sub> NO  | -                                       | 1.05 | 1.29 | 0.69 | -    | -            | -    | 0.96 | 1.78 | 0    |
| Acetamide, N-(2-phenylethyl)-          | C <sub>10</sub> H <sub>13</sub> NO | 0.66                                    | -    | 0.97 | 1.09 | 1.73 | -            | -    | -    | -    | -    |
| Dodecanamide, N-ethyl-                 | C <sub>14</sub> H <sub>29</sub> NO | 1.49                                    | 1.35 | 2.14 | 1.67 | 0.92 | -            | -    | -    | -    | -    |
| Hexadecanamide                         | C <sub>16</sub> H <sub>33</sub> NO | 0.86                                    | 0.96 | -    | -    | -    | 2.26         | 1.29 | 0.96 | 1.77 | 2.49 |
| 9-Octadecenamide, (Z)-                 | C <sub>18</sub> H <sub>35</sub> NO | 1.53                                    | 1.72 | 1.67 | 1.32 | 1.28 | 1.09         | 0    | 1.26 | 1.32 | 1.15 |
| 1-Octadecanamine, N-methyl-            | C <sub>19</sub> H <sub>41</sub> N  | 2.09                                    | 1.55 | 1.1  | 1.54 | 0.75 | 1.06         | 2.32 | 1.33 | -    | -    |
| Octadecanamide, N-butyl-               | C <sub>22</sub> H <sub>45</sub> NO | 0.85                                    | 0.92 | 1.18 | 0.76 | 1.35 | 0.88         | -    | -    | 1.06 | 1.67 |

|                                              |                                                              |      |      |      |      |      |      |      |      |      |      |
|----------------------------------------------|--------------------------------------------------------------|------|------|------|------|------|------|------|------|------|------|
| <b>Amines</b>                                |                                                              |      |      |      |      |      |      |      |      |      |      |
| Benzenamine, 3-methoxy-                      | C <sub>7</sub> H <sub>9</sub> NO                             | 1.07 | 0.91 | 1.22 | 0.85 | -    | 1.02 | 0.85 | 1.29 | -    | 1.97 |
| Benzenamine, 3,4-dimethoxy-                  | C <sub>8</sub> H <sub>11</sub> NO <sub>2</sub>               | 1.35 | -    | 0.53 | 1.12 | 0.83 | -    | 0.67 | -    | 1.33 | 1.64 |
| 1-Hexanamine, N-butyl-                       | C <sub>10</sub> H <sub>23</sub> N                            | 0.97 | 1.26 | 1.57 | 1.38 | 1.45 | 1.92 | 1.44 | 0.92 | -    | -    |
| 1,4-Benzenediamine, N,N-diethyl-             | C <sub>10</sub> H <sub>16</sub> N <sub>2</sub>               | -    | -    | -    | -    | -    | -    | 0.62 | -    | 0.83 | -    |
| N-Methyldodecanamide                         | C <sub>13</sub> H <sub>27</sub> NO                           | -    | -    | -    | -    | -    | -    | -    | 1.05 | 0    | 1.85 |
| N-Ethyl-4-methyl-4-decanamine                | C <sub>13</sub> H <sub>29</sub> N                            | -    | -    | -    | -    | -    | 1.94 | 1.05 | -    | 0.68 | -    |
| <b>Pyrroles</b>                              |                                                              |      |      |      |      |      |      |      |      |      |      |
| 2-Pyrrolidinone                              | C <sub>4</sub> H <sub>7</sub> NO                             | 1.03 | 1.73 | 2.21 | 1.98 | 2.35 | -    | 2.89 | 1.71 | 2.23 | 1.72 |
| 2,5-Pyrrolidinone, 1-methyl-                 | C <sub>5</sub> H <sub>7</sub> NO <sub>2</sub>                | -    | 1.32 | -    | 2.36 | 3.77 | -    | -    | -    | -    | -    |
| 2-Pyrrolidinone, 1-methyl-                   | C <sub>5</sub> H <sub>9</sub> NO                             | 2.09 | 2.27 | 2.38 | 1.75 | 3.05 | -    | -    | -    | -    | -    |
| 1-Ethyl-2-pyrrolidinone                      | C <sub>6</sub> H <sub>11</sub> NO                            | 1.92 | 1.3  | -    | 0.63 | 0.72 | 2.78 | -    | 1.96 | -    | -    |
| Pyrrolidine, 1-acetyl-                       | C <sub>6</sub> H <sub>11</sub> NO                            | 5.39 | 2.59 | 3.87 | 3.12 | 4.61 | -    | -    | -    | -    | -    |
| Pyrrolo[1,2-a]pyrazine-1,4-dione, hexahydro- | C <sub>7</sub> H <sub>10</sub> N <sub>2</sub> O <sub>2</sub> | -    | -    | -    | -    | -    | 1.91 | 3.78 | 2.54 | 0.92 | -    |
| <b>Pyridines</b>                             |                                                              |      |      |      |      |      |      |      |      |      |      |
| 3-Pyridinol, 2,6-dimethyl-                   | C <sub>7</sub> H <sub>9</sub> NO                             | 1.73 | 1.22 | 2.34 | 0.96 | 2.21 | 1.76 | -    | -    | 2.15 | -    |
| 2-Pyridinamine, 3-methyl-                    | C <sub>6</sub> H <sub>8</sub> N <sub>2</sub>                 | -    | 0.78 | 0.56 | 1.15 | 1.32 | 1.15 | 2.26 | -    | 1.62 | 1.06 |
| 4-Pyridinamine, N,N,2,6-tetramethyl-         | C <sub>9</sub> H <sub>13</sub> N <sub>2</sub>                | 1.04 | 1.5  | 1.32 | 1.89 | 1.67 | 1.33 | -    | 1.71 | 1.03 | -    |
| 3-Pyridinol, 2-ethyl-6-methyl-               | C <sub>8</sub> H <sub>11</sub> NO                            | -    | 1.32 | -    | 0.58 | 0.92 | -    | -    | -    | -    | -    |
| 9H-Pyrido[3,4-b]indole                       | C <sub>11</sub> H <sub>8</sub> N <sub>2</sub>                | 3.09 | 3.01 | 2.83 | 2.19 | 3.17 | 4.17 | 5.42 | 2.19 | 5.53 | 1.82 |
| 9H-Pyrido[3,4-b]indole, 1-methyl-            | C <sub>12</sub> H <sub>10</sub> N <sub>2</sub>               | -    | -    | -    | -    | -    | 1.09 | -    | 4.45 | -    | 3.26 |
| 2,3-Cyclododecenpppyridine                   | C <sub>15</sub> H <sub>23</sub> N                            | 1.16 | 1.32 | -    | -    | 0.97 | -    | -    | -    | -    | -    |
| <b>Indoles</b>                               |                                                              |      |      |      |      |      |      |      |      |      |      |
| Indole                                       | C <sub>8</sub> H <sub>7</sub> N                              | 5.19 | 3.98 | 4.45 | 6.37 | 5.03 | 6.37 | 5.64 | 6.56 | 4.9  | 5.19 |
| Indole, 3-methyl-                            | C <sub>9</sub> H <sub>9</sub> N                              | 3.87 | 3.67 | 4.24 | 6.43 | 2.96 | 2.63 | 2.59 | 3.77 | 4.76 | 5.66 |
| Indolizine, 2,3-dimethyl-                    | C <sub>10</sub> H <sub>11</sub> N                            | 0.56 | -    | -    | 0.51 | 1.06 | -    | 1.35 | -    | 1.72 | -    |

|                                                |                                                               |      |      |      |      |      |      |      |      |      |      |
|------------------------------------------------|---------------------------------------------------------------|------|------|------|------|------|------|------|------|------|------|
| <b><i>Pyrazines</i></b>                        |                                                               |      |      |      |      |      |      |      |      |      |      |
| Pyrazine, methyl-                              | C <sub>5</sub> H <sub>6</sub> N <sub>2</sub>                  | 0.71 | 0.58 | 0    | 1.78 | 1.06 | 3.12 | 2.06 | 4.16 | 3.03 | 3.63 |
| Pyrazine, 2,5-dimethyl-                        | C <sub>6</sub> H <sub>8</sub> N <sub>2</sub>                  | 2.32 | 1.85 | 2.77 | 3.05 | 4.34 | 2.65 | 1.76 | 1.83 | 3.72 | 4.25 |
| Pyrazine, 2-ethyl-3-methyl-                    | C <sub>7</sub> H <sub>10</sub> N <sub>2</sub>                 | 1.26 | 0.82 | 0    | 0    | -    | -    | 2.09 | 3.15 | 4.36 | 3.15 |
| Pyrazine, 3-ethyl-2,5-dimethyl-                | C <sub>8</sub> H <sub>12</sub> N <sub>2</sub>                 | 2.65 | 3.25 | 2.16 | 1.65 | 2.11 | 4.59 | 6.48 | 5.49 | 5.12 | 4.31 |
| 3,6-Dipropyl-2,5-dimethylpyrazine              | C <sub>12</sub> H <sub>20</sub> N <sub>2</sub>                | 1.32 | 0.96 | 1.54 | 0.98 | 0    | 1.45 | 0.84 | 1.36 | 2.34 | 2.29 |
| <b><i>Piperidines</i></b>                      |                                                               |      |      |      |      |      |      |      |      |      |      |
| Piperidine, 1-acetyl-                          | C <sub>7</sub> H <sub>13</sub> NO                             | 4.73 | 5.03 | 5.82 | 3.94 | 1.96 | 3.67 | 2.89 | 3.21 | 2.47 | 2.41 |
| 2-Piperidinone, 1-methyl-                      | C <sub>6</sub> H <sub>11</sub> NO                             | 0    | 1.76 | 2.94 | 2.09 | 0    | 1.29 | 3.92 | 0    | 0    | 3.09 |
| <b><i>Others</i></b>                           |                                                               |      |      |      |      |      |      |      |      |      |      |
| 3,6-Diisopropyl-2,5-piperazinedione            | C <sub>10</sub> H <sub>18</sub> N <sub>2</sub> O <sub>2</sub> | 1.76 | 2.07 | 1.98 | -    | 1.32 | 2.96 | 0.94 | 1.81 | -    | 3.05 |
| <b><i>Oxygenated compounds</i></b>             |                                                               |      |      |      |      |      |      |      |      |      |      |
| <b><i>Organic acids</i></b>                    |                                                               |      |      |      |      |      |      |      |      |      |      |
| n-Hexadecanoic acid                            | C <sub>16</sub> H <sub>32</sub> O <sub>2</sub>                | 2.07 | 4.65 | 3.97 | 2.96 | 2.45 | -    | 1.72 | 1.85 | 0.95 | -    |
| 9,12-Octadecadienoic acid (Z,Z)-               | C <sub>18</sub> H <sub>32</sub> O <sub>2</sub>                | 3.12 | 3.42 | 2.66 | 3.63 | 4.13 | 1.26 | 1.59 | 1.8  | 1.67 | 2.04 |
| <b><i>Alcohols</i></b>                         |                                                               |      |      |      |      |      |      |      |      |      |      |
| Erythritol                                     | C <sub>4</sub> H <sub>10</sub> O <sub>4</sub>                 | -    | 0.69 | 1.02 | -    | 0.93 | -    | -    | -    | -    | -    |
| Isosorbide                                     | C <sub>6</sub> H <sub>10</sub> O <sub>4</sub>                 | 4.72 | 4.26 | 4.88 | 5.5  | 3.78 | 4.26 | 3.89 | 4.61 | 5.13 | 4.77 |
| Sorbitol                                       | C <sub>6</sub> H <sub>14</sub> O <sub>6</sub>                 | 6.32 | 5.4  | 5.1  | 4.29 | 4.79 | 3.69 | 4.26 | 4.36 | 2.75 | 3.9  |
| Neoergosterol                                  | C <sub>27</sub> H <sub>40</sub> O                             | -    | 1.83 | 1.63 | 2.23 | 1.92 | 1.34 | 3.1  | 2.59 | 3.71 | 2.83 |
| Ergosterol                                     | C <sub>28</sub> H <sub>44</sub> O                             | 2.64 | 1.25 | 1.45 | 0.96 | 2.01 | 5.12 | 4.87 | 3.22 | 4.12 | 2.73 |
| <b><i>Esters</i></b>                           |                                                               |      |      |      |      |      |      |      |      |      |      |
| Acetic acid, octyl ester                       | C <sub>10</sub> H <sub>20</sub> O <sub>2</sub>                | 3.64 | 2.71 | 2.85 | 2.14 | 4.33 | 3.24 | 2.91 | 2.63 | 3.32 | 2.96 |
| Hexadecanoic acid, ethyl ester                 | C <sub>18</sub> H <sub>36</sub> O <sub>2</sub>                | 3.67 | 2.69 | 4.23 | 3.52 | 1.93 | 4.69 | 5.09 | 5.66 | 3.89 | 4.14 |
| 9,12-Octadecadienoic acid (Z,Z)-, methyl ester | C <sub>19</sub> H <sub>34</sub> O <sub>2</sub>                | 6.11 | 4.78 | 4.04 | 5.19 | 6.66 | 6.42 | 6.11 | 5.48 | 4.56 | 5.55 |
| <b><i>Phenols</i></b>                          |                                                               |      |      |      |      |      |      |      |      |      |      |

|                       |                                                |      |      |      |      |      |      |      |      |      |      |
|-----------------------|------------------------------------------------|------|------|------|------|------|------|------|------|------|------|
| Phenol                | C <sub>6</sub> H <sub>6</sub> O                | 2.65 | -    | 4.31 | 2.65 | -    | 1.81 | 2.1  | -    | 1.26 | 1.56 |
| p-Cresol              | C <sub>7</sub> H <sub>8</sub> O                | -    | 2.05 | -    | 1.82 | 1.15 | 2.12 | -    | 3.24 | 1.95 | 2.43 |
| <i>Aldehydes</i>      |                                                |      |      |      |      |      |      |      |      |      |      |
| Dodecanal             | C <sub>12</sub> H <sub>24</sub> O              | 1.95 | 0.82 | -    | 1.23 | 2.09 | 2.87 | 1.96 | 1.29 | 1.77 | 3.71 |
| Decanal               | C <sub>10</sub> H <sub>20</sub> O              | 1.26 | 0.97 | -    | 0.75 | -    | -    | 1.06 | -    | 2.14 | -    |
| Oxacyclododecan-2-one | C <sub>11</sub> H <sub>20</sub> O <sub>2</sub> | -    | 1.34 | 1.52 | -    | 0.53 | 1.63 | -    | 0.65 | -    | -    |

**Table S3.** The main organic compound components of bio-oil (ZSM-5, MCM-48)

| Chemical compound                      | Molecular formula                  | Area (%)      |      |      |      |      |                |      |      |      |      |
|----------------------------------------|------------------------------------|---------------|------|------|------|------|----------------|------|------|------|------|
|                                        |                                    | ZSM-5 (wt. %) |      |      |      |      | MCM-48 (wt. %) |      |      |      |      |
|                                        |                                    | 1             | 3    | 5    | 8    | 10   | 1              | 3    | 5    | 8    | 10   |
| <b>Hydrocarbons</b>                    |                                    |               |      |      |      |      |                |      |      |      |      |
| Decane                                 | C <sub>10</sub> H <sub>22</sub>    | 0.79          | 1.11 | 1.7  | 0.99 | 1.25 | 1.14           | 0.95 | 1.42 | 0.87 | -    |
| 1H-Indene,2,3-dihydro-1,1,4-trimethyl- | C <sub>12</sub> H <sub>16</sub>    | -             | 1.41 | -    | 1.55 | -    | -              | 1.35 | 0.92 | 1.72 | 1.85 |
| 1,2,3,4-Tetrahydrochrysene             | C <sub>18</sub> H <sub>16</sub>    | 1.07          | -    | 1.56 | 1.92 | 2.15 | -              | -    | 0.96 | 1.32 | -    |
| Heptadecane                            | C <sub>17</sub> H <sub>36</sub>    | -             | 0.95 | 1.25 | -    | 1.64 | 0.95           | -    | -    | -    | 1.69 |
| 1-Nonadecene                           | C <sub>19</sub> H <sub>38</sub>    | 1.56          | 1.78 | 1.44 | 2.08 | 1.46 | 1.25           | 2.48 | 3.12 | 2.23 | 1.06 |
| Atis-16-ene, 5π8π9π10π12π-             | C <sub>20</sub> H <sub>32</sub>    | -             | -    | -    | -    | -    | -              | -    | -    | -    | -    |
| E,E-1,9,17-Docasatriene                | C <sub>22</sub> H <sub>40</sub>    | 2.34          | 2.86 | 1.89 | 3.05 | 1.83 | 2.76           | 0.92 | 1.53 | 2.02 | 1.73 |
| Cholest-5-ene                          | C <sub>27</sub> H <sub>46</sub>    | 1.76          | 2.32 | 3.32 | 1.48 | 1.52 | 2.04           | 2.17 | 1.85 | 2.13 | 1.08 |
| 3,5-Cyclo-6,8(14),22-ergostatriene     | C <sub>28</sub> H <sub>42</sub>    | -             | -    | -    | -    | -    | 2.31           | 1.92 | 1.43 | 1.63 | 2.95 |
| <b>Nitrogen compounds</b>              |                                    |               |      |      |      |      |                |      |      |      |      |
| <b>Amides</b>                          |                                    |               |      |      |      |      |                |      |      |      |      |
| N,N-Dimethylacetamide                  | C <sub>4</sub> H <sub>9</sub> NO   | 0.81          | -    | 1.21 | 1.44 | -    | -              | 0.65 | 1.34 | 0.95 | -    |
| N-(3-Methylbutyl)acetamide             | C <sub>7</sub> H <sub>15</sub> NO  | 1.02          | 1.12 | -    | -    | 0.56 | -              | -    | -    | -    | -    |
| Acetamide, N-(2-phenylethyl)-          | C <sub>10</sub> H <sub>13</sub> NO | -             | -    | -    | -    | 1.69 | 0.97           | -    | -    | 0.65 | 1.42 |
| Dodecanamide, N-ethyl-                 | C <sub>14</sub> H <sub>29</sub> NO | -             | 1.69 | -    | 1.24 | -    | 1.38           | -    | -    | 0.89 | 1.56 |
| Hexadecanamide                         | C <sub>16</sub> H <sub>33</sub> NO | 2.51          | 1.78 | 1.56 | 0.96 | 1.07 | -              | 1.77 | 1.43 | -    | -    |
| 9-Octadecenamide, (Z)-                 | C <sub>18</sub> H <sub>35</sub> NO | -             | 2.04 | 1.24 | -    | 1.25 | 2.32           | 1.59 | 1.17 | 1.44 | 1.32 |
| 1-Octadecanamine, N-methyl-            | C <sub>19</sub> H <sub>41</sub> N  | 1.25          | -    | 0.95 | 1.46 | 1.09 | 0.96           | 2.32 | 1.76 | -    | 1.29 |
| Octadecanamide, N-butyl-               | C <sub>22</sub> H <sub>45</sub> NO | 1.33          | 1.65 | 2.33 | 1.81 | 1.34 | 1.09           | 1.35 | -    | 1.26 | 1.63 |
| <b>Amines</b>                          |                                    |               |      |      |      |      |                |      |      |      |      |

|                                              |                                                              |      |      |      |      |      |      |      |      |      |      |
|----------------------------------------------|--------------------------------------------------------------|------|------|------|------|------|------|------|------|------|------|
| Benzenamine, 3-methoxy-                      | C <sub>7</sub> H <sub>9</sub> NO                             | -    | -    | -    | -    | -    | 1.45 | 1.69 | 0.85 | -    | 0.73 |
| Benzenamine, 3,4-dimethoxy-                  | C <sub>8</sub> H <sub>11</sub> NO <sub>2</sub>               | -    | 0.95 | 1.13 | 0.73 | -    | -    | -    | 1.01 | 1.86 | -    |
| Amphetamine                                  | C <sub>9</sub> H <sub>13</sub> N                             | -    | -    | 1.01 | 1.24 | 0.87 | -    | -    | -    | -    | -    |
| 1,4-Benzenediamine, N,N-diethyl-             | C <sub>10</sub> H <sub>16</sub> N <sub>2</sub>               | 1.14 | 0.76 | -    | 0.96 | -    | 2.13 | 1.76 | 1.32 | 0.96 | -    |
| N-Methyldodecanamide                         | C <sub>13</sub> H <sub>27</sub> NO                           | -    | 0.59 | 0.86 | 1.73 | -    | -    | -    | 0.86 | -    | 1.1  |
| N-Ethyl-4-methyl-4-decanamine                | C <sub>13</sub> H <sub>29</sub> N                            | 1.53 | -    | 1.97 | -    | 1.33 | 1.45 | 0.98 | 0.6  | 1.21 | -    |
| <b><i>Pyrroles</i></b>                       |                                                              |      |      |      |      |      |      |      |      |      |      |
| 2-Pyrrolidinone                              | C <sub>4</sub> H <sub>7</sub> NO                             | 1.86 | 1.02 | -    | 0.83 | -    | 2.23 | 1.56 | 1.33 | -    | 0.83 |
| 2,5-Pyrrolidinone, 1-methyl-                 | C <sub>5</sub> H <sub>7</sub> NO <sub>2</sub>                | 2.72 | -    | 3.16 | 1.8  | 4.23 | 1.95 | -    | -    | 2.31 | 2.62 |
| 2-Pyrrolidinone, 1-methyl-                   | C <sub>5</sub> H <sub>9</sub> NO                             | 1.13 | 3.9  | 2.33 | 3.15 | -    | -    | -    | -    | -    | -    |
| 1-Ethyl-2-pyrrolidinone                      | C <sub>6</sub> H <sub>11</sub> NO                            | -    | 0.72 | -    | -    | 2.12 | -    | 1.23 | -    | -    | -    |
| Pyrrolidine, 1-acetyl-                       | C <sub>6</sub> H <sub>11</sub> NO                            | 3.56 | 4.23 | 2.9  | 3.16 | 1.97 | 2.36 | 3.15 | 2.85 | 3.02 | 2.13 |
| Pyrrolo[1,2-a]pyrazine-1,4-dione, hexahydro- | C <sub>7</sub> H <sub>10</sub> N <sub>2</sub> O <sub>2</sub> | 2.31 | 1.37 | 1.56 | 0.96 | -    | 1.74 | 0.95 | 2.08 | 1.62 | 0.86 |
| N-(3-Hydroxypropyl)-2-pyrrolidone            | C <sub>7</sub> H <sub>13</sub> NO <sub>2</sub>               | -    | 1.21 | -    | -    | -    | 1.26 | -    | 1.82 | 0.95 | -    |
| <b><i>Pyridines</i></b>                      |                                                              |      |      |      |      |      |      |      |      |      |      |
| 3-Pyridinol, 2,6-dimethyl-                   | C <sub>7</sub> H <sub>9</sub> NO                             | -    | 2.14 | 1.78 | -    | 2.56 | -    | 1.14 | -    | 2.32 | -    |
| 2-Pyridinamine, 3-methyl-                    | C <sub>6</sub> H <sub>8</sub> N <sub>2</sub>                 | 1.13 | 0.97 | -    | 0.65 | 1.45 | 1.26 | -    | 0.96 | 2.74 | 1.65 |
| 4-Pyridinamine, N,N,2,6-tetramethyl-         | C <sub>9</sub> H <sub>13</sub> N <sub>2</sub>                | 1.65 | 0.81 | 2.04 | 1.43 | 1.76 | -    | 1.25 | 1.13 | -    | 1.03 |
| 3-Pyridinol, 2-ethyl-6-methyl-               | C <sub>8</sub> H <sub>11</sub> NO                            | 1.17 | -    | 1.83 | -    | 2.34 | -    | -    | 1.05 | -    | -    |
| 9H-Pyrido[3,4-b]indole                       | C <sub>11</sub> H <sub>8</sub> N <sub>2</sub>                | 5.76 | 2.56 | 3.45 | 5.55 | 4.36 | 5.33 | 6.52 | 5.86 | 4.96 | 5.2  |
| 9H-Pyrido[3,4-b]indole, 1-methyl-            | C <sub>12</sub> H <sub>10</sub> N <sub>2</sub>               | -    | 4.01 | 1.06 | 3.06 | 2.0  | 3.21 | 2.04 | 2.52 | 1.87 | 2.85 |
| 2,3-Cyclododecenpyridine                     | C <sub>15</sub> H <sub>23</sub> N                            | 0.97 | -    | -    | 1.19 | 0.65 | -    | 0.86 | 1.25 | 0.56 | -    |
| <b><i>Indoles</i></b>                        |                                                              |      |      |      |      |      |      |      |      |      |      |
| Indole                                       | C <sub>8</sub> H <sub>7</sub> N                              | 5.67 | 4.44 | 6.2  | 3.97 | 4.6  | 4.73 | 3.93 | 3.26 | 4.23 | 5.8  |
| Indole, 3-methyl-                            | C <sub>9</sub> H <sub>9</sub> N                              | 3.51 | 2.67 | 2.11 | 4.36 | 2.96 | 3.67 | 4.23 | 5.53 | 3.85 | 4.3  |
| Indolizine, 2,3-dimethyl-                    | C <sub>10</sub> H <sub>11</sub> N                            | -    | -    | 4.03 | -    | 1.52 | -    | -    | -    | -    | -    |



|                                                |                                                               |      |      |      |      |      |      |      |      |      |      |
|------------------------------------------------|---------------------------------------------------------------|------|------|------|------|------|------|------|------|------|------|
| <b><i>Pyrazines</i></b>                        |                                                               |      |      |      |      |      |      |      |      |      |      |
| Pyrazine, methyl-                              | C <sub>5</sub> H <sub>6</sub> N <sub>2</sub>                  | -    | 2.71 | 1.45 | 1.76 | 3.1  | -    | 1.14 | 2.2  | 1.34 | 1.05 |
| Pyrazine, 2,5-dimethyl-                        | C <sub>6</sub> H <sub>8</sub> N <sub>2</sub>                  | 3.49 | 2.62 | 2.78 | 2.63 | 3.11 | 1.76 | 3.05 | 2.31 | 3.89 | 2.78 |
| Pyrazine, 2-ethyl-3-methyl-                    | C <sub>7</sub> H <sub>10</sub> N <sub>2</sub>                 | -    | -    | -    | -    | -    | 4.13 | 2.89 | 3.24 | 4.78 | 3.67 |
| Pyrazine, 3-ethyl-2,5-dimethyl-                | C <sub>8</sub> H <sub>12</sub> N <sub>2</sub>                 | 2.22 | 1.72 | -    | 1.4  | -    | 2.56 | 3.41 | 1.96 | 2.16 | 1.64 |
| <b><i>Piperidines</i></b>                      |                                                               |      |      |      |      |      |      |      |      |      |      |
| Piperidine, 1-acetyl-                          | C <sub>7</sub> H <sub>13</sub> NO                             | 3.56 | 2.76 | 2.05 | 2.33 | 3.17 | 3.52 | 4.01 | 3.17 | 2.81 | 4.53 |
| <b><i>Others</i></b>                           |                                                               |      |      |      |      |      |      |      |      |      |      |
| 3,6-Diisopropyl-2,5-piperazinedione            | C <sub>10</sub> H <sub>18</sub> N <sub>2</sub> O <sub>2</sub> | 2.32 | 1.5  | 0.96 | 1.56 | 0.97 | 1.26 | 0.95 | 0    | 0    | 1.85 |
| <b><i>Oxygenated compounds</i></b>             |                                                               |      |      |      |      |      |      |      |      |      |      |
| <b><i>Organic acids</i></b>                    |                                                               |      |      |      |      |      |      |      |      |      |      |
| n-Hexadecanoic acid                            | C <sub>16</sub> H <sub>32</sub> O <sub>2</sub>                | 3.73 | 2.62 | 3.25 | 1.9  | 2.13 | 3.69 | 1.65 | 2.88 | 3.15 | 2.45 |
| 9,12-Octadecadienoic acid (Z,Z)-               | C <sub>18</sub> H <sub>32</sub> O <sub>2</sub>                | 3.89 | 4.16 | 3.15 | 5.49 | 4.6  | 4.54 | 5.41 | 6.02 | 4.7  | 3.9  |
| <b><i>Alcohols</i></b>                         |                                                               |      |      |      |      |      |      |      |      |      |      |
| Isosorbide                                     | C <sub>6</sub> H <sub>10</sub> O <sub>4</sub>                 | 5.01 | 4.72 | 5.7  | 3.89 | 6.31 | 4.82 | 4.19 | 5.67 | 4.26 | 3.96 |
| Sorbitol                                       | C <sub>6</sub> H <sub>14</sub> O <sub>6</sub>                 | 3.43 | 5.34 | 3.15 | 4.25 | 2.1  | 5.69 | 4.93 | 3.85 | 4.2  | 4.53 |
| Cyclohexanol, 3,3,5-trimethyl-                 | C <sub>9</sub> H <sub>18</sub> O                              | -    | 0.83 | -    | 1.74 | -    | 0.95 | -    | -    | -    | -    |
| Neoergosterol                                  | C <sub>27</sub> H <sub>40</sub> O                             | 2.83 | 4.02 | 3.11 | 1.74 | 2.16 | 3.05 | 2.78 | 4.12 | 3.44 | 2.75 |
| Ergosterol                                     | C <sub>28</sub> H <sub>44</sub> O                             | 3.22 | 2.41 | 2.69 | 3.0  | 2.2  | 2.62 | 3.42 | 1.23 | 1.89 | 3.17 |
| <b><i>Esters</i></b>                           |                                                               |      |      |      |      |      |      |      |      |      |      |
| Acetic acid, octyl ester                       | C <sub>10</sub> H <sub>20</sub> O <sub>2</sub>                | 3.67 | 2.89 | 1.78 | 2.51 | 3.71 | -    | -    | -    | -    | -    |
| Hexadecanoic acid, ethyl ester                 | C <sub>18</sub> H <sub>36</sub> O <sub>2</sub>                | 4.78 | 5.13 | 6.3  | 3.23 | 2.58 | 3.12 | 5.07 | 4.73 | 3.69 | 5.16 |
| 9,12-Octadecadienoic acid (Z,Z)-, methyl ester | C <sub>19</sub> H <sub>34</sub> O <sub>2</sub>                | 3.15 | 1.26 | 2.05 | 4.23 | 3.03 | 2.66 | 1.53 | 1.25 | 2.32 | 1.52 |
| <b><i>Phenols</i></b>                          |                                                               |      |      |      |      |      |      |      |      |      |      |
| Phenol                                         | C <sub>6</sub> H <sub>6</sub> O                               | 1.62 | -    | -    | 2.14 | 1.85 | 2.35 | 1.21 | 0    | 1.67 | -    |
| p-Cresol                                       | C <sub>7</sub> H <sub>8</sub> O                               | 2.1  | 3.25 | 1.86 | -    | 3.06 | -    | 2.56 | 2.71 | 3.22 | 3.87 |

|                       |                   |      |     |      |      |      |      |      |      |      |      |  |
|-----------------------|-------------------|------|-----|------|------|------|------|------|------|------|------|--|
| <i>Aldehydes</i>      |                   |      |     |      |      |      |      |      |      |      |      |  |
| Dodecanal             | $C_{12}H_{24}O$   | -    | 1.6 | -    | 3.45 | 4.35 | 2.13 | 1.8  | -    | 2.91 | 4.03 |  |
| Decanal               | $C_{10}H_{20}O$   | 2.43 | -   | 3.85 | -    | -    | -    | 1.24 | 2.63 | -    | 2.46 |  |
| Oxacyclododecan-2-one | $C_{11}H_{20}O_2$ | -    | -   | -    | -    | -    | 1.21 | -    | 0.82 | -    | -    |  |
